# Supplementary material
Source: publisher figshare collection journal article supplement (https://gsajournals.figshare.com/ndownloader/files/27743277)
Supplement: Supplementary file 1 [file 27743277]

| **Table S9.** Lost genes in the genome of the smelt compared with other species. | | | |
| --- | --- | --- | --- |
| Compared Genomes | Human (*Homo sapiens*) | Zebrafish (*Danio rerio*) | Atlantic salmon (*Salmo salar*) |
| Compared Genes* | 20,129 | 26,612 | 48,548 |
| Cov* < 10% | 4,461 (22.16%) | 2,825 (10.62%) | 1,499 (3.09%) |
| Cov < 15% | 6,047 (30.04%) | 3,901 (14.66%) | 2,008 (4.14%) |
| *Compared Genomes contains only protein coding sequences. | | |  |
| *Cov means coverage. | |  |  |
